# Supplementary material for: Methane selective oxidation to methanol by metal-exchanged zeolites: a review of active sites and their reactivity
Source: Royal Society of Chemistry journal article supplement (doi:10.1039/c8cy02414f), 2019-01-01
Supplement: c8cy02414f1.pdf [file c8cy02414f1.pdf]

*Electronic Supplementary Information*

**Methane Selective Oxidation to Methanol by Metal-Exchanged Zeolites: A Review of Active Sites and Their Reactivity**

Muhammad Haris Mahyuddin, Yoshihito Shiota and Kazunari Yoshizawa\*

Institute for Materials Chemistry and Engineering and IRCCS, Kyushu University, Fukuoka 819-0395, Japan

\* To whom all correspondence should be addressed (e-mail: [kazunari@ms.ifoc.kyushu-u.ac.jp](mailto:kazunari@ms.ifoc.kyushu-u.ac.jp)).

## Table of Contents:

|                  |                                                                                                                                                                                       |
|------------------|---------------------------------------------------------------------------------------------------------------------------------------------------------------------------------------|
| <b>Scheme S1</b> | The heterolytic mechanism for C–H bond cleavage of methane.                                                                                                                           |
| <b>Fig. S1</b>   | Reaction energy diagrams of methane hydroxylation over $[\text{Cu}_2(\mu\text{-O})]^{2+}\text{-MOR}$ ( $\text{T4}_{3\text{Si}}$ and $\text{T3'}_{3\text{Si}}$ ).                      |
| <b>Table S1</b>  | Geometrical properties and spin densities along the reaction over $[\text{Cu}_2(\mu\text{-O})]^{2+}\text{-MOR}$ ( $\text{T4}_{3\text{Si}}$ and $\text{T3'}_{3\text{Si}}$ ).           |
| <b>Fig. S2</b>   | Reaction energy diagrams of methane hydroxylation over $[\text{Cu}_2(\mu\text{-O})_2]^{2+}\text{-MFI}$ .                                                                              |
| <b>Table S2</b>  | Geometrical properties and spin densities along methane hydroxylation on $[\text{Cu}_2(\mu\text{-O})_2]^{2+}\text{-MFI}$ .                                                            |
| <b>Fig. S3</b>   | Reaction energy diagrams of methane hydroxylation over $[\text{CoOH}]^+\text{-MFI}$ .                                                                                                 |
| <b>Table S3</b>  | Geometrical properties and spin densities along methane hydroxylation on $[\text{CoOH}]^+\text{-MFI}$ .                                                                               |
| <b>Fig. S4</b>   | Reaction energy diagrams of methane hydroxylation over $[\text{Co}_2(\mu\text{-O})_2]^{2+}\text{-MFI}$ .                                                                              |
| <b>Table S4</b>  | Geometrical properties and spin densities along methane hydroxylation on $[\text{Co}_2(\mu\text{-O})_2]^{2+}\text{-MFI}$ .                                                            |
| <b>Table S5</b>  | Geometrical properties and spin densities along $\text{N}_2\text{O}$ decomposition over $[\text{Fe}]^{2+}\text{-MFI}$ and methane hydroxylation over $[\text{FeO}]^{2+}\text{-MFI}$ . |
| <b>Table S6</b>  | Geometrical properties and spin densities along methane hydroxylation on $[\text{Cu}_2(\mu\text{-O})]^{2+}\text{-MFI}$ .                                                              |
| <b>Table S7</b>  | Geometrical properties and spin densities along methane hydroxylation on $[\text{CoO}]^{2+}\text{-MFI}$ .                                                                             |
| <b>Table S8</b>  | Geometrical properties and spin densities along dioxygen activation on $[\text{2Ni}]^{2+}\text{-MFI}$ .                                                                               |
| <b>Fig. S5</b>   | Hydrogen-terminated large cluster model of $[\text{FeO}]^{2+}\text{-MFI}$ .                                                                                                           |
| <b>Fig. S6</b>   | Hydrogen-terminated large cluster models of $[\text{Cu}(\mu\text{-O})]^{2+}\text{-MOR}$ .                                                                                             |

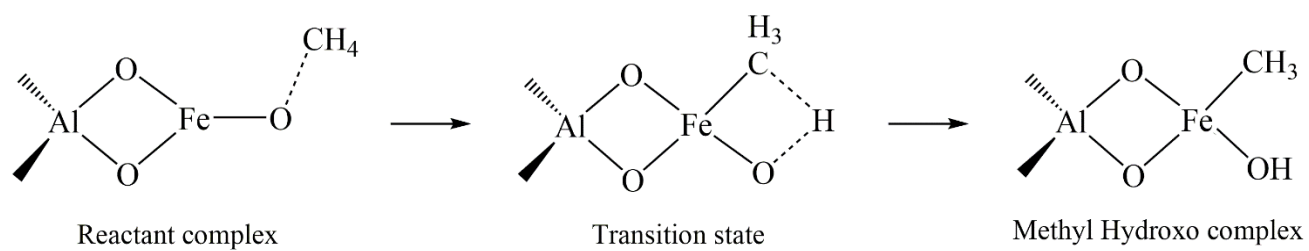

**Scheme S1** Heterolytic C-H bond cleavage of methane by [FeO]<sup>+</sup>-zeolites via a four-center transition state.

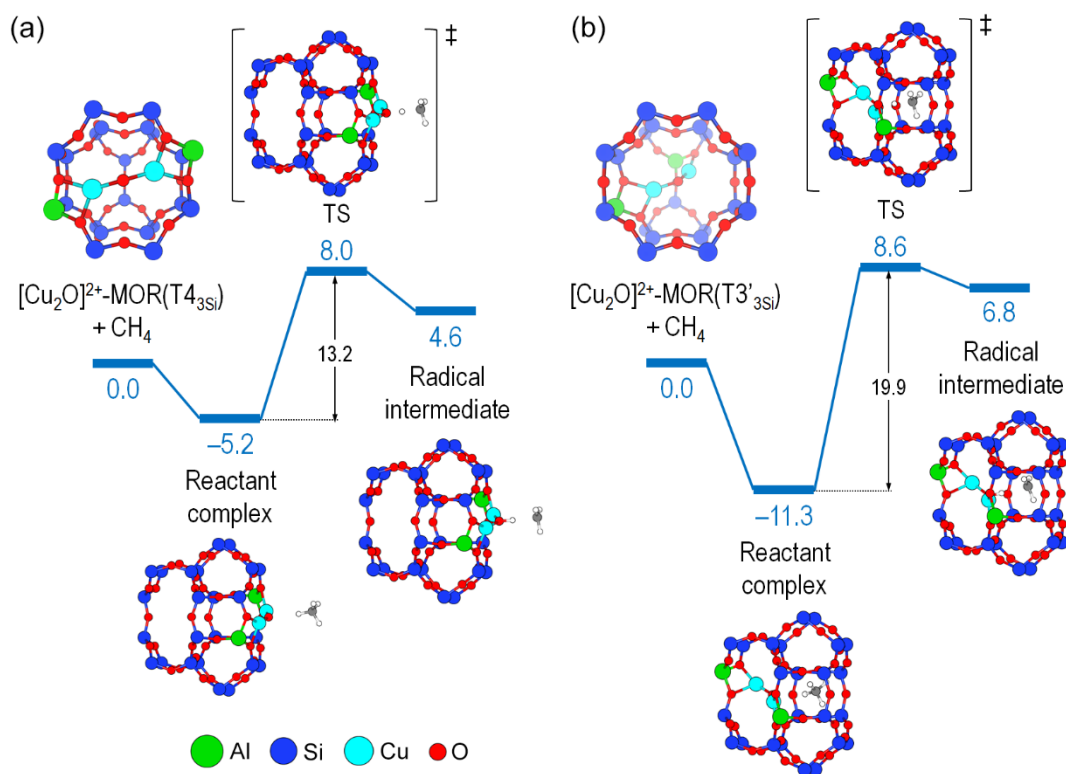

**Fig. S1** Triplet-state energy diagrams and optimized structures of methane hydroxylation over  $[\text{Cu}_2(\mu\text{-O})]^{2+}$  hosted on the (a)  $\text{T4}_{3\text{Si}}$  and (b)  $\text{T3}'_{3\text{Si}}$  Al pair sites of MOR zeolite framework. All energies are given in kcal/mol and include the vdW-D2 correction. See Table S1 for detailed geometrical parameters.

**Table S1.** Geometrical properties and atomic spin densities ( $\rho$ ) along the methane hydroxylation over  $[\text{Cu}_2(\mu\text{-O})]^{2+}$ -MOR( $\text{T4}_{3\text{Si}}$ ) and -MOR( $\text{T3}'_{3\text{Si}}$ ) in the triplet ground state.

|                                  | $\angle\text{CuOCu}$<br>( $^\circ$ ) | $d_{\text{C-H}}$<br>( $\text{\AA}$ ) | $d_{\text{O-H}}$<br>( $\text{\AA}$ ) | $d_{\text{O-C}}$<br>( $\text{\AA}$ ) | $d_{\text{Cu-O}}$<br>( $\text{\AA}$ ) | $\rho(\text{Cu1, Cu2})$ | $\rho(\text{O, C})$ |
|----------------------------------|--------------------------------------|--------------------------------------|--------------------------------------|--------------------------------------|---------------------------------------|-------------------------|---------------------|
| MOR( $\text{T4}_{3\text{Si}}$ )  |                                      |                                      |                                      |                                      |                                       |                         |                     |
| $\text{Cu}_2\text{O-MOR}$        | 148.5                                | -                                    | -                                    | -                                    | 1.744, 1.744                          | 0.53, 0.53              | 0.74                |
| RC                               | 148.6                                | 1.100                                | 2.375                                | 3.473                                | 1.744, 1.744                          | 0.53, 0.53              | 0.73, 0.00          |
| TS                               | 132.5                                | 1.398                                | 1.182                                | 2.581                                | 1.826, 1.826                          | 0.40, 0.40              | 0.46, 0.53          |
| RI                               | 133.6                                | 1.870                                | 1.005                                | 2.874                                | 1.841, 1.842                          | 0.36, 0.36              | 0.23, 0.84          |
| MOR( $\text{T3}'_{3\text{Si}}$ ) |                                      |                                      |                                      |                                      |                                       |                         |                     |
| $\text{Cu}_2\text{O-MOR}$        | 133.0                                | -                                    | -                                    | -                                    | 1.743, 1.758                          | 0.51, 0.55              | 0.71                |
| RC                               | 135.2                                | 1.097                                | 2.385                                | 3.271                                | 1.746, 1.759                          | 0.51, 0.55              | 0.70, 0.00          |
| TS                               | 122.2                                | 1.448                                | 1.162                                | 2.576                                | 1.825, 1.852                          | 0.40, 0.42              | 0.42, 0.53          |
| RI                               | 126.9                                | 2.191                                | 0.985                                | 3.026                                | 1.850, 1.860                          | 0.38, 0.38              | 0.16, 0.87          |

RC, TS, and RI stand for reactant complex, transition state, and radical intermediate, respectively.

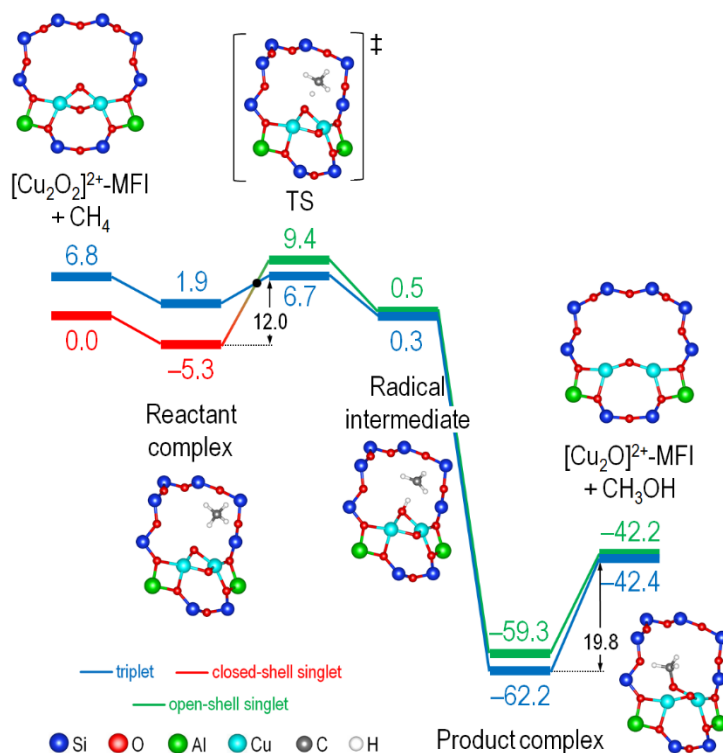

**Fig. S2** Reaction energy diagrams of methane hydroxylation over  $[\text{Cu}_2(\mu\text{-O})_2]^{2+}$  ( $\text{O}\cdots\text{O} = 2.152 \text{ \AA}$ ) hosted on the T3/T3 Al pair site of MFI zeolite framework. All energies are given in kcal/mol and include the vdW-D2 correction. While the two Cu centers are initially  $\text{Cu}^{\text{III}}$ , those in TS are better described as a combination of  $\text{Cu}^{\text{II}}$  and  $\text{Cu}^{\text{III}}$ . The TS and radical intermediate can be formed only in the triplet and open-shell singlet states, but not in the closed-shell singlet state, showing the importance of spin inversion in this reaction. See Table S2 for detailed geometrical parameters and atomic spin densities.

**Table S2.** Geometrical properties and atomic spin densities ( $\rho$ ) along the methane hydroxylation over bis( $\mu$ -oxo)dicopper  $[\text{Cu}_2(\mu\text{-O})_2]^{2+}$ -MFI (T3/T3 Al pair site).

|                              | Ground state | $\angle\text{CuOCu}$<br>( $^\circ$ ) | $d_{\text{C-H}}$<br>( $\text{\AA}$ ) | $d_{\text{O-H}}$<br>( $\text{\AA}$ ) | $d_{\text{O-C}}$<br>( $\text{\AA}$ ) | $d_{\text{Cu-O}}$<br>( $\text{\AA}$ ) | $q(\text{Cu1}, \text{Cu2})$ | $q(\text{O}, \text{C})$ |
|------------------------------|--------------|--------------------------------------|--------------------------------------|--------------------------------------|--------------------------------------|---------------------------------------|-----------------------------|-------------------------|
| $\text{Cu}_2\text{O}_2$ -MFI | CSS          | 97.8                                 | -                                    | -                                    | -                                    | 1.858, 1.858                          | 0.00, 0.00                  | 0.00                    |
| RC                           | CSS          | 98.6                                 | 1.096                                | 2.369                                | 3.464                                | 1.858, 1.859                          | 0.00, 0.00                  | 0.00, 0.00              |
| TS                           | T            | 91.0                                 | 1.212                                | 1.393                                | 2.602                                | 2.064, 1.858                          | 0.52, -0.01                 | 0.74, 0.33              |
| RI                           | T            | 87.8                                 | 1.927                                | 1.002                                | 2.918                                | 2.133, 1.883                          | 0.55, 0.04                  | 0.14, 0.81              |
| PC                           | T            | 68.4                                 | -                                    | 0.976                                | 1.459                                | 3.254, 2.054                          | 0.48, 0.59                  | 0.06, 0.00              |
| $\text{Cu}_2\text{O}$ -MFI   | T            | 141.5                                | -                                    | -                                    | -                                    | 1.745, 1.745                          | 0.53, 0.53                  | 0.72                    |

T and CSS stand for triplet and closed-shell singlet states, respectively. O is the abstracting O atom.

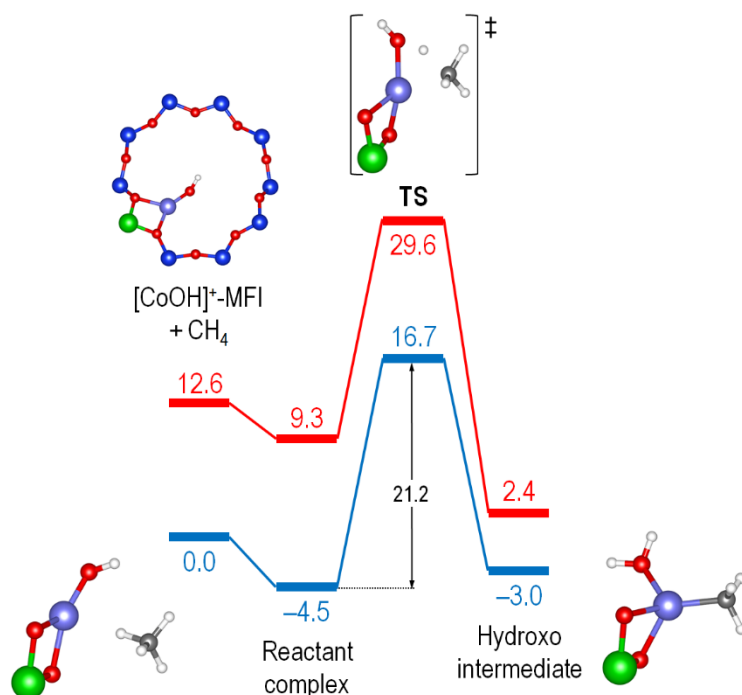

**Fig. S3** Reaction energy diagrams of methane hydroxylation over  $[\text{CoOH}]^+$ -MFI in the quartet (blue lines) and doublet (red lines) states. All energies are given in kcal/mol and include the vdW-D2 correction. See Table S3 for detailed geometrical parameters.

**Table S3.** Geometrical properties and atomic spin densities ( $\rho$ ) along the methane hydroxylation over  $[\text{CoOH}]^+$ -MFI (T1 Al site).

|         | Ground state | $d_{\text{C-H}}$<br>(Å) | $d_{\text{O-H}}$<br>(Å) | $d_{\text{O-C}}$<br>(Å) | $d_{\text{Co-O}}$<br>(Å) | $\rho(\text{Co})$ | $\rho(\text{O, C})$ |
|---------|--------------|-------------------------|-------------------------|-------------------------|--------------------------|-------------------|---------------------|
| CoO-MFI | Qa           | -                       | -                       | -                       | 1.752                    | 2.53              | 0.31                |
| RC      | Qa           | 1.103                   | 2.816                   | 3.741                   | 1.759                    | 2.54              | 0.30, 0.00          |
| TS      | Qa           | 1.468                   | 1.243                   | 2.665                   | 1.963                    | 2.53              | 0.16, 0.12          |
| HI      | Qa           | 3.614                   | 0.972                   | 3.447                   | 2.080                    | 2.62              | 0.05, 0.11          |

RC, TS, HI, and Qa stand for reactant complex, transition state, hydroxo intermediate, and quartet state, respectively. O is the abstracting O atom.

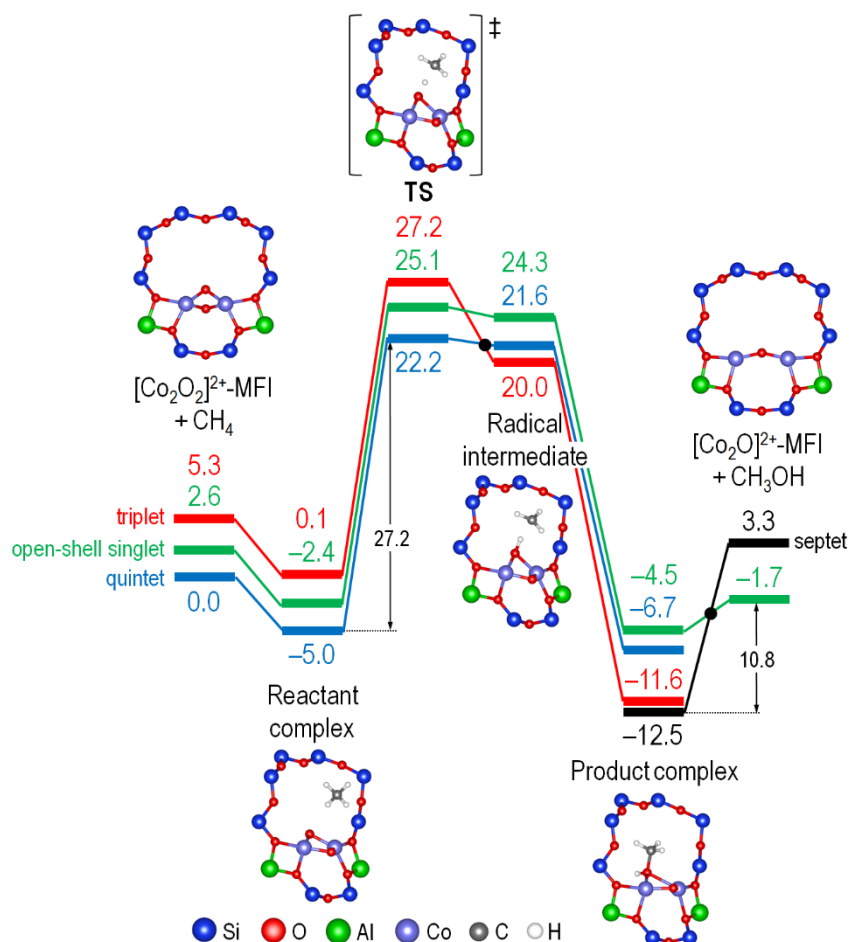

**Fig. S4** Reaction energy diagrams of methane hydroxylation over  $[\text{Co}_2(\mu\text{-O})_2]^{2+}$  hosted on the T3/T3 Al pair site of MFI zeolite framework. All energies are given in kcal/mol and include the vdW-D2 correction. See Table S4 for detailed geometrical parameters.

**Table S4.** Geometrical properties and atomic spin densities ( $\rho$ ) along the methane hydroxylation over bis( $\mu$ -oxo)dycobalt  $[\text{Co}_2(\mu\text{-O})_2]^{2+}$ -MFI (T3/T3 Al pair site).

|                              | Ground state | $\angle\text{CoOCO}$<br>( $^\circ$ ) | $d_{\text{C-H}}$<br>( $\text{\AA}$ ) | $d_{\text{O-H}}$<br>( $\text{\AA}$ ) | $d_{\text{O-C}}$<br>( $\text{\AA}$ ) | $d_{\text{Co-O}}$<br>( $\text{\AA}$ ) | $q(\text{Co1}, \text{Co2})$ | $q(\text{O}, \text{C})$ |
|------------------------------|--------------|--------------------------------------|--------------------------------------|--------------------------------------|--------------------------------------|---------------------------------------|-----------------------------|-------------------------|
| $\text{Co}_2\text{O}_2$ -MFI | Qi           | 89.3                                 | -                                    | -                                    | -                                    | 1.800, 1.801                          | 1.64, 1.64                  | 0.28                    |
| RC                           | Qi           | 89.5                                 | 1.098                                | 2.610                                | 3.693                                | 1.794, 1.806                          | 1.64, 1.64                  | 0.28, 0.00              |
| TS                           | Qi           | 82.6                                 | 1.513                                | 1.108                                | 2.617                                | 1.917, 1.914                          | 1.42, 1.42                  | 0.19, 0.61              |
| RI                           | OST          | 84.8                                 | 1.719                                | 1.030                                | 2.701                                | 1.907, 1.904                          | 1.29, 1.29                  | -0.07, -0.75            |
| PC                           | Sp           | 74.2                                 | -                                    | 0.978                                | 1.473                                | 2.304, 2.284                          | 2.54, 2.54                  | 0.08, 0.01              |
| $\text{Co}_2\text{O}$ -MFI   | OSS          | 149.0                                | -                                    | -                                    | -                                    | 1.709, 1.708                          | 2.28, -2.28                 | 0.00                    |

Qi, OST, OSS, and Sp stand for quintet, open-shell triplet, open-shell singlet states, and septet states, respectively. O is the abstracting O atom.

**Table S5.** Geometrical properties and atomic spin densities ( $\rho$ ) along the N<sub>2</sub>O decomposition over [Fe]<sup>2+</sup>-MFI methane hydroxylation over [FeO]<sup>2+</sup>-MFI (T11/T11 Al pair site)

|                      | Ground<br>state | $d_{\text{N-O}}$<br>(Å) | $d_{\text{C-H}}$<br>(Å) | $d_{\text{O-H}}$<br>(Å) | $d_{\text{O-C}}$<br>(Å) | $d_{\text{Fe-O}}$<br>(Å) | $\rho(\text{Fe})$ | $\rho(\text{O, C})$ |
|----------------------|-----------------|-------------------------|-------------------------|-------------------------|-------------------------|--------------------------|-------------------|---------------------|
| Fe-MFI               | Qi              | -                       | -                       | -                       | -                       | -                        | 3.61              | -                   |
| N <sub>2</sub> O Ads | Qi              | 1.214                   | -                       | -                       | -                       | 2.263                    | 3.63              | 0.03                |
| TS                   | Qi              | 1.467                   | -                       | -                       | -                       | 1.819                    | 3.77              | 0.05                |
| FeO-MFI              | Qi              | -                       | -                       | -                       | -                       | 1.617                    | 3.10              | 0.51                |
| RC                   | Qi              | -                       | 1.099                   | 2.550                   | 3.589                   | 1.618                    | 3.10              | 0.51, 0.00          |
| TS1                  | Qi              | -                       | 1.234                   | 1.319                   | 2.547                   | 1.701                    | 3.65              | 0.24, -0.28         |
| RI                   | Qi              | -                       | 1.772                   | 1.016                   | 2.785                   | 1.774                    | 3.97              | 0.37, -0.77         |
| TS2                  | Qi              | -                       | 2.192                   | 0.978                   | 2.725                   | 1.795                    | 3.95              | 0.36, -0.75         |
| PC                   | Qi              | -                       | -                       | 0.973                   | 1.463                   | 2.041                    | 3.62              | 0.07, 0.00          |

Qi stands for quintet state. RC, TS, RI, and PC stand for reactant complex, transition state, radical intermediate, and respectively.

**Table S6.** Geometrical properties and atomic spin densities ( $\rho$ ) along the methane hydroxylation over mono( $\mu$ -oxo)dicopper [Cu<sub>2</sub>( $\mu$ -O)]<sup>2+</sup>-MFI (T3/T3 Al pair site).

|                       | Ground<br>state | $\angle\text{CuOCu}$<br>(°) | $d_{\text{C-H}}$<br>(Å) | $d_{\text{O-H}}$<br>(Å) | $d_{\text{O-C}}$<br>(Å) | $d_{\text{Cu-O}}$<br>(Å) | $\rho(\text{Cu1, Cu2})$ | $\rho(\text{O, C})$ |
|-----------------------|-----------------|-----------------------------|-------------------------|-------------------------|-------------------------|--------------------------|-------------------------|---------------------|
| Cu <sub>2</sub> O-MFI | T               | 141.5                       | -                       | -                       | -                       | 1.745, 1.745             | 0.53, 0.53              | 0.72                |
| RC                    | T               | 142.4                       | 1.100                   | 2.413                   | 3.510                   | 1.743, 1.743             | 0.53, 0.53              | 0.71, 0.00          |
| TS                    | T               | 127.1                       | 1.404                   | 1.182                   | 2.584                   | 1.823, 1.823             | 0.40, 0.40              | 0.45, 0.54          |
| RI                    | T               | 128.5                       | 1.922                   | 1.003                   | 2.916                   | 1.841, 1.841             | 0.36, 0.36              | 0.21, 0.86          |
| PC                    | CSS             | 77.1                        | -                       | 0.978                   | 1.495                   | 2.026, 2.027             | 0.00, 0.00              | 0.00, 0.00          |
| 2Cu-MFI               | CSS             | -                           | -                       | -                       | -                       | -                        | 0.00, 0.00              | -                   |

T and CSS stand for triplet and closed-shell singlet states, respectively. RC, TS, RI, and PC stand for reactant complex, transition state, radical intermediate, and product complex, respectively.



**Table S7.** Geometrical properties and atomic spin densities ( $\rho$ ) along the methane hydroxylation over  $[\text{CoO}]^{2+}$ -MFI (T11/T11 Al pair site).

|         | Ground<br>state | $d_{\text{C-H}}$<br>(Å) | $d_{\text{O-H}}$<br>(Å) | $d_{\text{O-C}}$<br>(Å) | $d_{\text{Co-O}}$<br>(Å) | $\rho(\text{Co})$ | $\rho(\text{O, C})$ |
|---------|-----------------|-------------------------|-------------------------|-------------------------|--------------------------|-------------------|---------------------|
| CoO-MFI | Qa              | -                       | -                       | -                       | 1.598                    | 2.00              | 0.69                |
| RC      | Qa              | 1.098                   | 2.483                   | 3.564                   | 1.600                    | 2.00              | 0.69, 0.00          |
| TS1     | Qa              | 1.213                   | 1.365                   | 2.570                   | 1.660                    | 2.46              | 0.40, -0.20         |
| RI      | Qa              | 1.697                   | 1.030                   | 2.726                   | 1.738                    | 2.85              | 0.44, -0.68         |
| TS2     | Qa              | 1.916                   | 0.992                   | 2.540                   | 1.762                    | 2.83              | 0.41, -0.65         |
| PC      | Qa              | -                       | 0.974                   | 1.460                   | 1.986                    | 2.63              | 0.07, 0.00          |
| Co-MFI  | Qa              | -                       | -                       | -                       | -                        | 2.60              | -                   |

Qa stands for quartet state. O is the abstracting O atom.

**Table S8.** Geometrical properties and atomic spin densities ( $\rho$ ) along dioxygen activation on  $[\text{2Ni}]^{2+}$ -MFI.

|                                         | Ground<br>state | $d_{\text{O-O}}$<br>(Å) | $d_{\text{Ni-O}}$<br>(Å)      | $\rho(\text{Ni})$ | $\rho(\text{O})$ |
|-----------------------------------------|-----------------|-------------------------|-------------------------------|-------------------|------------------|
| $[\text{2Ni}]^{2+}$ -MFI + $\text{O}_2$ | Qi              | 1.207                   | -                             | 0.94, 0.93        | 1.00, 1.00       |
| Peroxo- $\text{Ni}^{\text{II}}_2$       | Qi              | 1.517                   | 1.930, 1.933,<br>1.948, 1.946 | 1.62, 1.62        | 0.30, 0.25       |
| TS                                      | OSS             | 1.724                   | 1.851, 1.852,<br>1.820, 1.820 | 0.53, -0.53       | 0.00, 0.00       |
| Bisoxo- $\text{Ni}^{\text{III}}_2$      | OSS             | 2.207                   | 1.796, 1.797,<br>1.783, 1.783 | 1.02, -1.02       | 0.00, 0.00       |

Qi and OSS stand for quintet and open-shell singlet states, respectively.

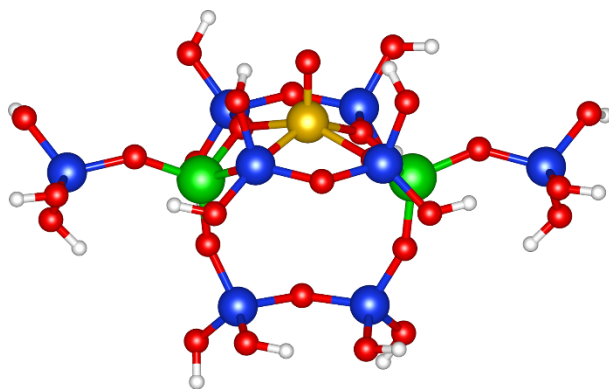

**Fig. S5** Hydrogen-terminated large cluster model of  $[\text{FeO}]^{2+}$ -MFI in the quintet ground state. The model was constructed from the optimized periodic structure reported previously by our group (ref. 74). The geometry optimization was performed by fixing the Si atoms while the other atoms were allowed to fully relaxed. Color legend: Fe (gold), Si (blue), Al (green), O (red), H (white).

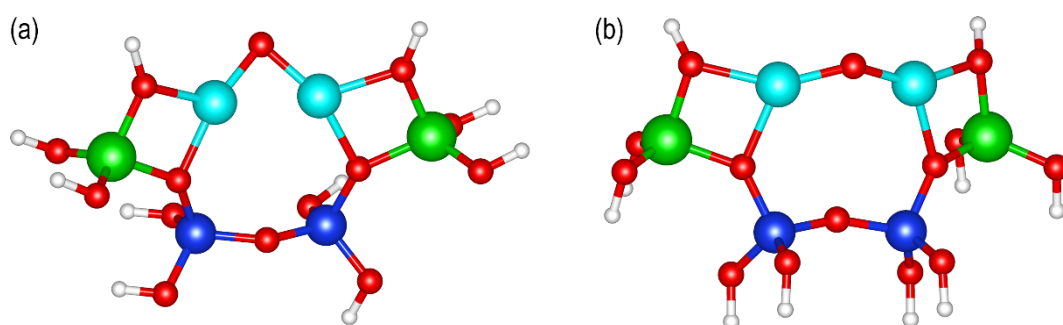

**Fig. S6** Hydrogen-terminated large cluster models of  $[\text{Cu}(\mu\text{-O})]^{2+}$  hosted on (a)  $\text{T}_{2\text{Si}}$  and (b)  $\text{T}_{4\text{Si}}$  Al pair sites of MOR. The models were constructed from the optimized periodic structures reported previously by our group (ref. 100). The MO calculations were performed by fixing all atoms except the terminating H atoms. Color legend: Cu (cyan), Si (blue), Al (green), O (red), C (grey), H (white).
